# Supplementary material for: Combination simvastatin and metformin induces G1-phase cell cycle arrest and Ripk1- and Ripk3-dependent necrosis in C4-2B osseous metastatic castration-resistant prostate cancer cells
Source: PubMed Central journal article supplement (PMC4260755; doi:10.1038/cddis.2014.500), 2014-11-20
Supplement: cddis2014500x1.pdf [file cddis2014500x1.pdf]

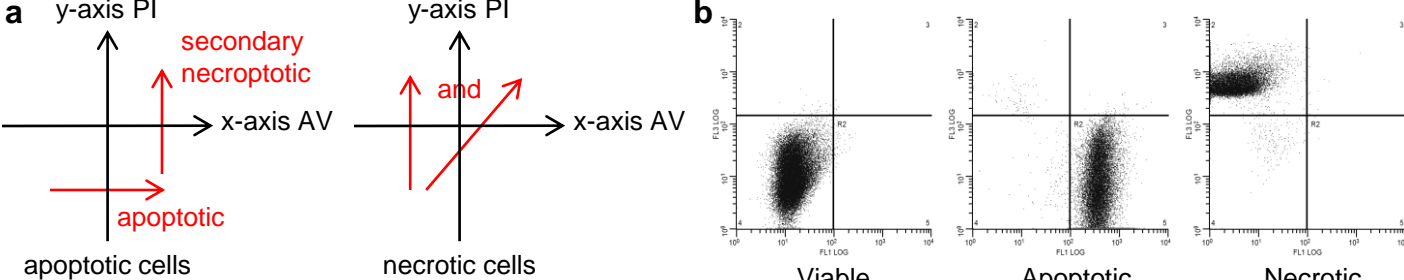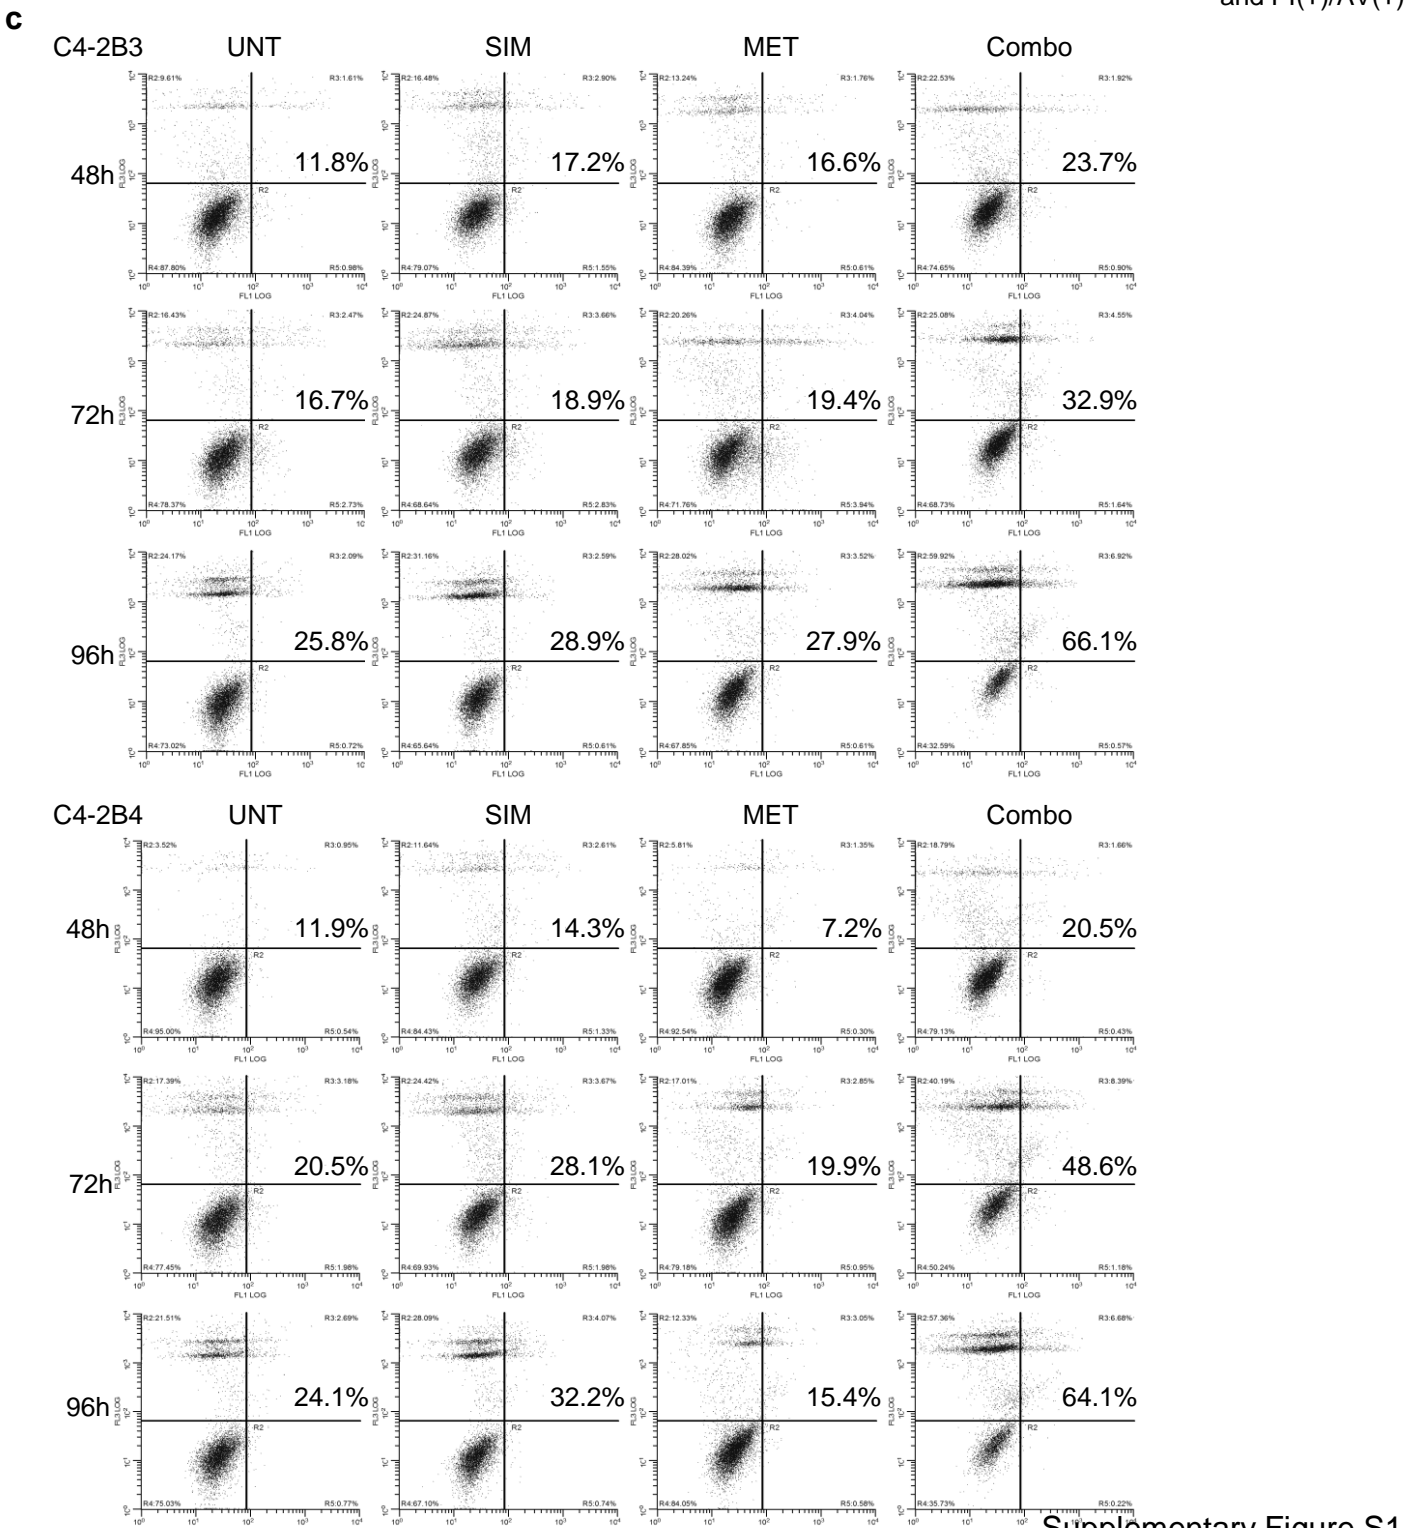

Supplementary Figure S1

**Supplementary Figure S1.** (previous page) Combination SIM and MET induces necrosis in C4-2B3 and C4-2B4 metastatic CRPC cells. **(a)** In apoptotic and necrotic cell death analysis by propidium iodide (PI) and FITC-conjugated Annexin V (AV) flow cytometry, apoptotic cells stain positive for AV prior to staining positive for PI; whereas, in necrotic cells, PI positivity and AV positivity coincide. **(b)** Representative PI/AV assay negative and positive controls. Viable cells have low PI and AV staining (lower-left quadrant), apoptotic cells have low PI and high AV staining (lower-right quadrant), and necrotic cells have high PI staining, and may or may not be AV positive (upper quadrants). **(c)** C4-2B3 and C4-2B4 cells treated with 4 $\mu$ M SIM and/or 2mM MET for 48-96h, followed by staining with AV and PI and analyzed by flow cytometry. Results are shown as density plots with AV x-axis and PI y-axis. One representative experiment of three is shown. Mean percentage of PI(+) cells stated on plot. UNT, untreated; SIM, 4 $\mu$ M simvastatin; MET, 2mM metformin; Combo, combination 4 $\mu$ M simvastatin and 2mM metformin.

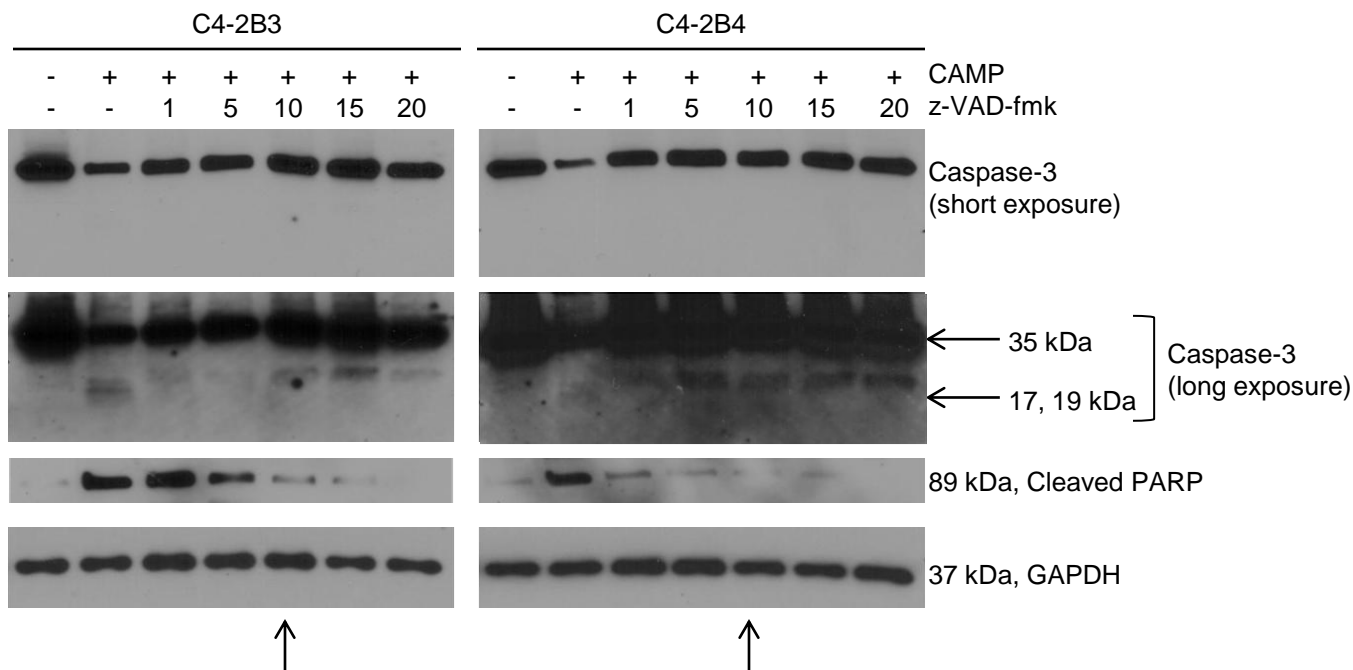

**Supplementary Figure S2.** 10 $\mu$ M z-VAD-fmk prevents caspase-3 and PARP cleavage induced by 2 $\mu$ M (S)-(+)-camptothecin treatment in C4-2B3 and C4-2B4 metastatic CRPC cells. Western blot analysis of total cell lysates from C4-2B3 and C4-2B4 cells following treatment with 2 $\mu$ M (S)-(+)-camptothecin (CAMP)  $\pm$  1-20  $\mu$ M z-VAD-fmk pan-caspase inhibitor for 48h. GAPDH used as loading control.

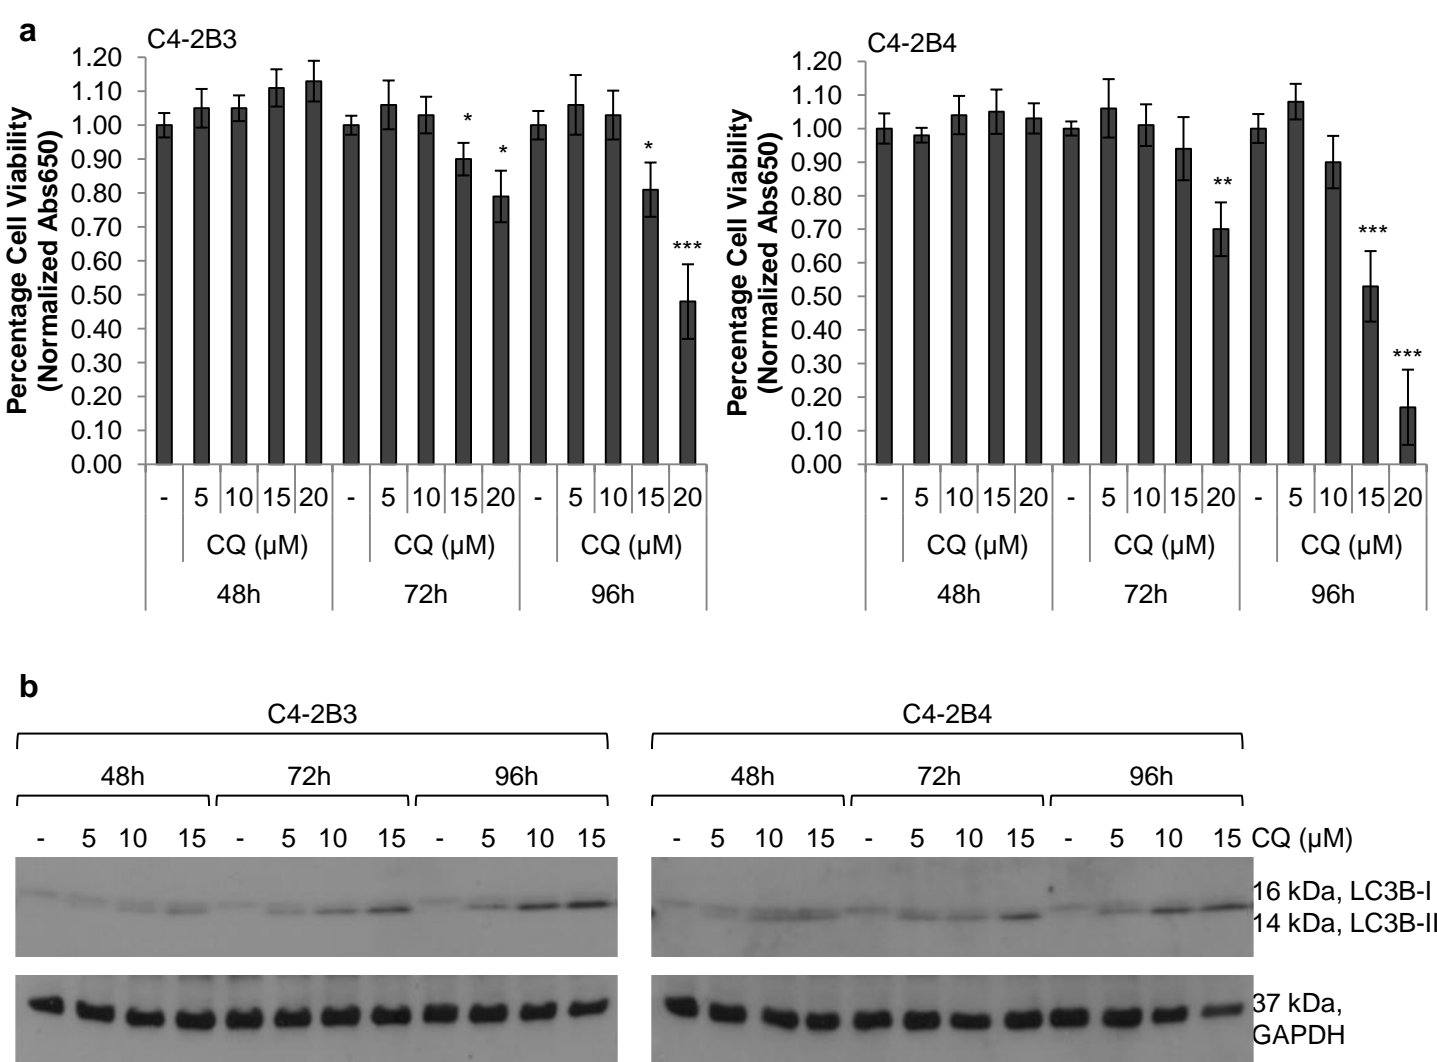

**Supplementary Figure S3.** 10μM chloroquine inhibits lysosomal function without significantly affecting C4-2B3 and C4-2B4 cell viability. **(a)** Percentage cell viability (mean ± S.D.) by methylene blue in C4-2B3 and C4-2B4 cells following treatment with 5-20 μM chloroquine (CQ) for 48-96h, n = 3 per group. \*  $P < 0.05$ , \*\*  $P < 0.01$ , \*\*\*  $P < 0.001$  determined by two-tailed Student's t test compared to respective untreated control. **(b)** Western blot analysis of LC3B protein expression from total cell lysates from C4-2B3 and C4-2B4 cells following treatment with 5-15 μM CQ for 48-96h. GAPDH used as loading control.



## C4-2B3

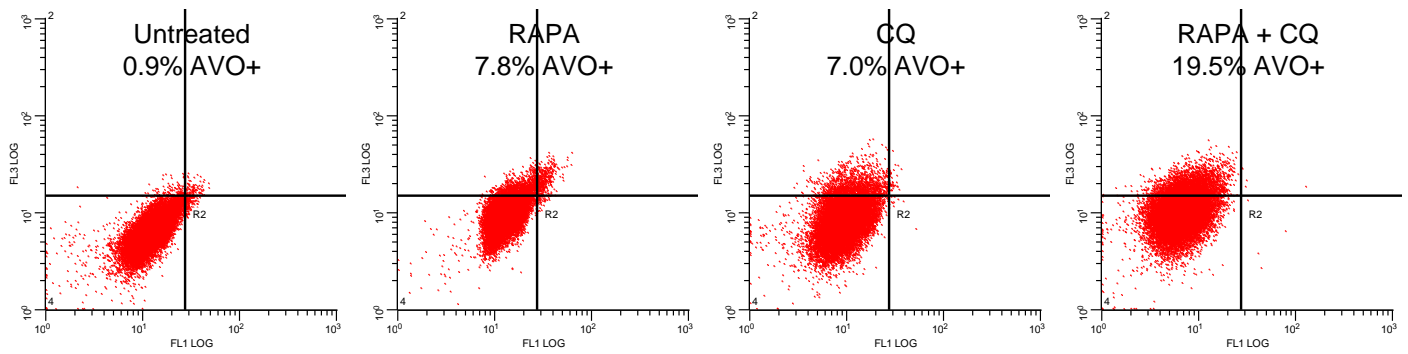

## C4-2B4

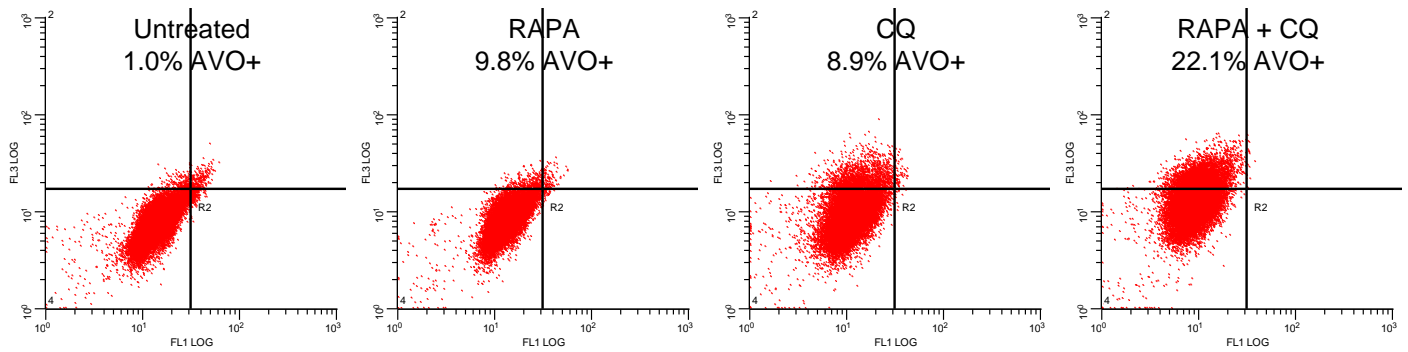

**Supplementary Figure S4.** Rapamycin positive controls for acridine orange flow cytometric quantification of acidic vesicular organelles. Representative density plots and quantification of acidic vesicular organelles (AVOs) by acridine orange staining using flow cytometry in C4-2B3 and C4-2B4 cells treated with 500 nM rapamycin (RAPA)  $\pm$  10  $\mu$ M chloroquine (CQ) for 48h. In acridine orange-stained cells, the nucleus fluoresces green (525 nm emission, x-axis), whereas acidic compartments fluoresce red (620 nm emission, y-axis). The intensity of the red fluorescence is proportional to the degree of acidity and to the volume of AVOs, including autophagic vacuoles. Mean (n = 2 per treatment) percentages of cells with a significant proportion of AVOs stated on plot.

**Supplementary Table S1.** Primary antibodies for immunoblotting and immunoprecipitation.

| <b>Primary Antibody</b>                          | <b>Manufacturer</b>       | <b>Catalog No.</b> |
|--------------------------------------------------|---------------------------|--------------------|
| Total and cleaved caspase-3                      | Cell Signaling Technology | 9662               |
| Cleaved PARP (Asp214)                            | Cell Signaling Technology | 9544               |
| LC3B                                             | Cell Signaling Technology | 2775               |
| Sequestosome 1 (SQSTM1/p62) (A-6)                | Santa Cruz Biotechnology  | sc-48402           |
| Ripk1                                            | BD Biosciences            | 610458             |
| Ripk3                                            | Enzo Life Sciences        | ADI-905-242-100    |
| HMGB-1                                           | BD Biosciences            | 556528             |
| Glyceraldehyde 3-phosphate dehydrogenase (GAPDH) | Cell Signaling Technology | 2118               |
